# Supplementary material for: Reduction mechanisms of additives on Si anodes of Li-ion batteries
Source: Royal Society of Chemistry journal article supplement (doi:10.1039/c4cp01948b), 2014-01-01
Supplement: c4cp01948b1.pdf [file c4cp01948b1.pdf]

Supplemental Information to “Reduction Mechanisms of Additives on Si anodes of Li-ion  
Batteries,” by J. M. Martinez de la Hoz and P. B. Balbuena

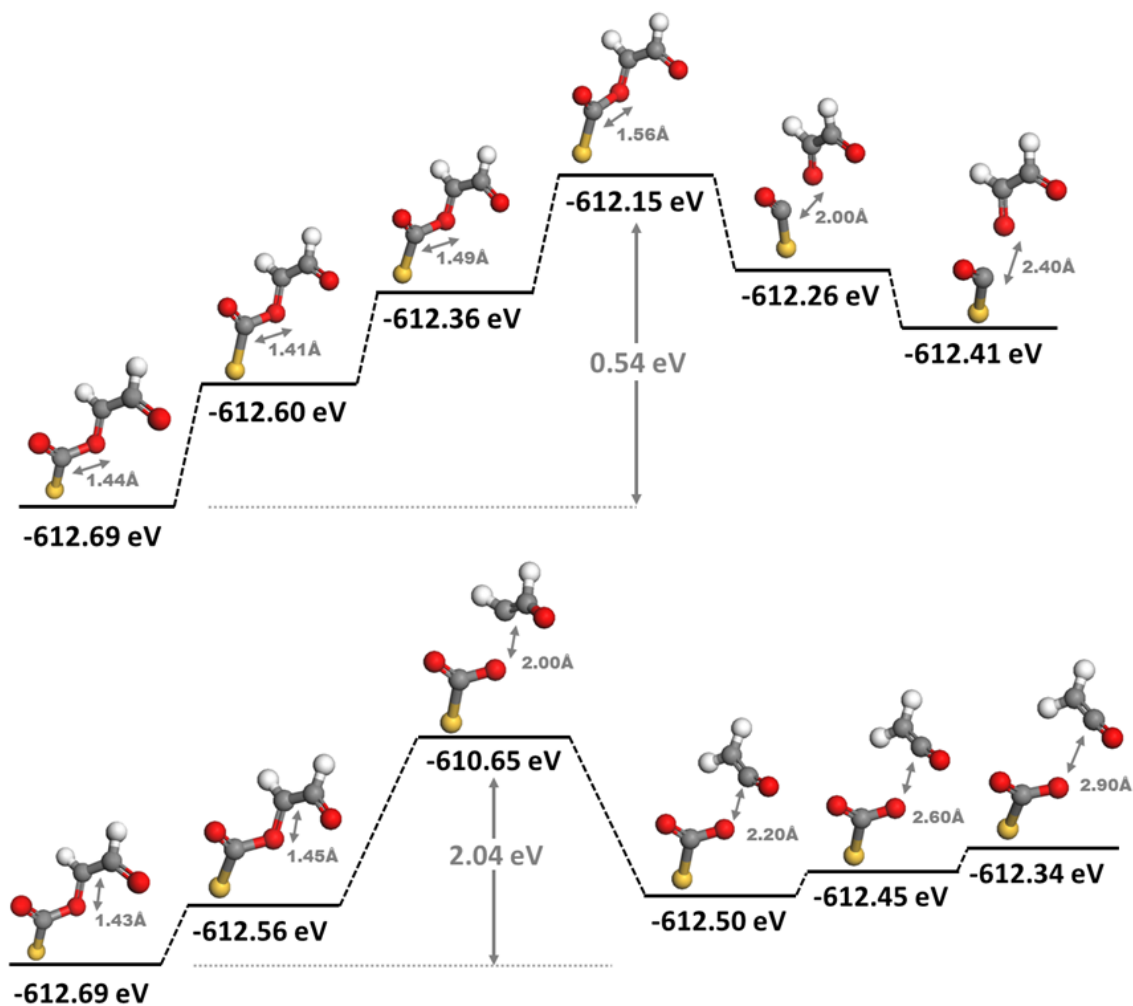

**Fig. S1** Optimized configurations and energies along the reaction coordinates for the formation of CO (top) and CO<sub>2</sub> (bottom) from OC<sub>2</sub>H<sub>2</sub>OCO<sub>2</sub><sup>2-</sup><sub>(ads)</sub>. These calculations were performed using the NEB method with a single OC<sub>2</sub>H<sub>2</sub>OCO<sub>2</sub><sup>2-</sup> species (gas-phase) on LiSi(101)-H.
